# Supplementary material
Source: HighWire-hosted journal article supplement (https://www.cmajopen.ca/highwire/filestream/85269/field_highwire_adjunct_files/1/2020-0130-original-submission.pdf)
Supplement: 2020-0130-original-submission.pdf [file 2020-0130-original-submission.pdf]

## Comparing childhood asthma incidence in three neighbouring cities in Southwestern Ontario: a 25-year longitudinal cohort study

Dhenuka Radhakrishnan MD<sup>1,2,3</sup>, Sarah E. Bota BA<sup>3</sup>, April Price MD<sup>4,5,9</sup>, Alexandra Ouédraogo MSc<sup>3</sup>, Murad Husein MD<sup>4,6,9</sup>, Kristin K. Clemens MD<sup>3,7,8,9</sup>, Salimah Z. Shariff PhD<sup>3,9</sup>

1. Children's Hospital of Eastern Ontario Research Institute, Ottawa, ON, Canada
2. Department of Pediatrics, University of Ottawa, Ottawa, Ontario, Canada
3. ICES, Ontario, Canada
4. London Health Sciences Centre, London, ON, Canada
5. Department of Pediatrics, Western University, London, ON, Canada
6. Department of Surgery, Western University, London, ON, Canada
7. Department of Medicine & Department of Epidemiology and Biostatistics, Western University, London, ON, Canada.
8. St. Joseph's Health Care London, London, ON, Canada
9. Lawson Health Research Institute, London, ON, Canada

### Corresponding Author:

Dhenuka Radhakrishnan  
Children's Hospital of Eastern Ontario  
401 Smyth Road  
Ottawa, Ontario  
K1H 8L1  
Phone: 613-737-7600  
Email: [dradhakrishnan@cheo.on.ca](mailto:dradhakrishnan@cheo.on.ca)

**Key Words:** asthma, air pollution, incidence, children

**Abbreviated Title:** Comparing incident asthma in Southwestern Ontario

**Conflicts of Interest:** None to declare.

**Source of Funding:** This study was supported by ICES, which is funded by an annual grant from the Ontario Ministry of Health and Long-Term Care (MOHLTC). The study was completed at the ICES Western site, where core funding is provided by the Academic Medical Organization of Southwestern Ontario, the Schulich School of Medicine and Dentistry, Western University, and the Lawson Health Research Institute (LHRI). This study also received funding from an LHRI Internal Research Fund grant. The analyses, conclusions, opinions and statements expressed herein are solely those of the authors and do not reflect those of the funding sources; no endorsement is intended or should be inferred.

**Acknowledgements:** Parts of this material are based on data and information compiled and provided by the Canadian Institute for Health Information, MOHLTC and the Ontario Ministry

1  
2  
3 of the Environment. The analyses, conclusions, opinions and statements expressed herein are  
4 solely those of the authors and do not reflect those of the funding or data sources; no  
5 endorsement is intended or should be inferred. The opinions, results, and conclusions reported in  
6 this paper are those of the authors and do not necessarily reflect those of data providers; no  
7 endorsement is intended or should be inferred.  
8  
9

10 **Data sharing:** The data set from this study is held securely in coded form at ICES. While data  
11 sharing-agreements prohibit ICES from making the data set publicly available, access can be  
12 granted to those who meet pre-specified criteria for confidential access, available at  
13 [www.ices.on.ca/DAS](http://www.ices.on.ca/DAS).  
14  
15  
16  
17  
18  
19  
20  
21  
22  
23  
24  
25  
26  
27  
28  
29  
30  
31  
32  
33  
34  
35  
36  
37  
38  
39  
40  
41  
42  
43  
44  
45  
46  
47  
48  
49  
50  
51  
52  
53  
54  
55  
56  
57  
58  
59  
60

Confidential

## Abstract

Background: Air pollution is a known trigger for exacerbations among individuals with asthma, but its role in the development of new onset asthma is unclear. We aimed to compare the rate of new asthma cases in Sarnia, a city with high pollution levels, to two neighbouring regions in Southwestern Ontario.

Methods: Using a population-based birth cohort design, and linked health administrative data, we compared the risk of incident asthma between children born in Lambton (Sarnia) versus Windsor and London-Middlesex from April 1, 1993 to March 31, 2008. We used Cox proportional-hazards models to adjust for year of birth, and air pollutant exposures as well as maternal, geographical, and socioeconomic factors.

Results: Among 114,427 children, the highest incidence of asthma was in Lambton at 30.3, followed by Windsor at 24.4 and London-Middlesex at 19.8 per 1,000 person years ( $p < 0.0001$ ). The risk of asthma adjusted for socioeconomic and perinatal factors was lower in Windsor (HR = 0.71; 95% CI: 0.67, 0.74) and London-Middlesex (HR = 0.60; 95% CI: 0.58, 0.63) compared to Lambton. Inclusion of air pollutants attenuated this difference in Windsor (HR = 0.79; 95% CI: 0.62, 1.01), and London (HR = 0.89; 95% CI: 0.64, 1.24) such that asthma risk was no longer different compared to Lambton.

Interpretation: We identified a higher incidence of asthma among children born in Lambton (Sarnia) relative to two other regions in Southwestern Ontario. We suggest higher air pollution levels (particularly  $PM_{2.5}$ ) in the first year of life in this region, may be contributory.

## Introduction

Asthma is the most common chronic disease in children with a Canadian prevalence of 15% - 25%.<sup>1</sup> Asthma exacerbations reduce quality of life, and are a leading cause of emergency room visits and hospitalizations.<sup>2</sup> While there are numerous known risk factors for asthma exacerbations,<sup>3-12</sup> identifying new modifiable risk factors for its onset could lead to primary prevention.

There is a clear association reported in the literature between asthma exacerbations among individuals with previously diagnosed asthma and air pollution<sup>13,14,15-17</sup> but less certainty as to whether air pollution may be involved in the pathophysiology of new onset asthma.<sup>18-21</sup> This association has been challenging to study due to inadequate attribution of air pollution exposure owing to population mobility, and difficulties differentiating between workplace and residential exposures. Furthermore, most research has focused on adults<sup>22,23</sup>, but asthma likely develops during gestation or within the first year of life.<sup>24,25</sup> Systematic reviews of the relationship between incident asthma in children and air pollution exposure have been inconclusive.<sup>26</sup>

In the province of Ontario, Canada, a spatial analysis of asthma prevalence between 2002-2006 identified a cluster of high rates among children ages 10-14 in and around the city of Sarnia.<sup>27</sup> Sarnia, in Southwestern Ontario, is home to the “Chemical Valley”, which accounts for 40% of Canada’s chemical processing facilities<sup>28,29</sup>. This region has been recorded as having the worst air quality in our country, with measurements above the World Health Organization recommended limits.<sup>30</sup> In recent years, this region has received media and government attention

1  
2  
3 due revelations of unreported toxic emissions and high levels of morbidity as a result of exposure  
4 to pollutants.<sup>18,31,32</sup>  
5  
6  
7  
8  
9

10 We aimed to clarify the link between air pollution exposure and incident asthma in Canadian  
11 children. Using a population-based birth cohort design, we compared the rate of new asthma  
12 cases in Sarnia, to two neighbouring regions in Southwestern Ontario. We also examined if the  
13 risk of incident asthma attenuated with decreasing air pollution levels in more recent years.  
14  
15  
16  
17  
18  
19  
20

## 21 **Methods**

### 22 *Overview*

23  
24 We conducted a longitudinal birth cohort study spanning 25 years (April 1, 1993 to March 31,  
25 2018) using linked health administrative databases available at ICES. We compared the  
26 incidence of asthma in children born between April 1, 1993 to March 31, 2009 in three  
27 neighbouring urban regions in Southwestern Ontario. The reporting of this study follows the  
28 Reporting of Studies Conducted Using Observational Routinely Collected Health Data  
29 (RECORD) guidelines for observational studies.<sup>33</sup>  
30  
31  
32  
33  
34  
35  
36  
37  
38  
39  
40  
41

### 42 *Data Sources*

43  
44 In the province of Ontario, Canada (population 13 million) more than 99% are eligible for  
45 government funded health insurance through the Ontario Health Insurance Plan (OHIP). The  
46 OHIP number was used to link individuals to multiple health administrative datasets including  
47 the OHIP dataset, which contains information on all physician outpatient visits; the Ontario  
48 Registered Persons Database, which provides basic demographic information; and the Canadian  
49  
50  
51  
52  
53  
54  
55  
56  
57  
58  
59  
60

1  
2  
3 Institute of Health Information discharge abstract database (CIHI-DAD), which details all  
4 hospital admissions. The MOMBABY dataset is derived from CIHI-DAD and includes a record  
5  
6 of all mothers linked to their Ontario-born children. The Ontario Marginalization (ONMarg)  
7  
8 index<sup>34,35</sup> is a geographically based marker of socioeconomic status, consisting of four  
9  
10 dimensions: residential instability, material deprivation, dependency and ethnic concentration.  
11  
12  
13

14  
15  
16  
17 These health administrative datasets were further linked to the Ontario Ministry of Environment  
18  
19 air quality data<sup>36</sup> and Environment Canada's National Air Pollution Surveillance data<sup>37</sup>, two  
20  
21 publicly available datasets that provide information on air pollution levels across the province.  
22  
23  
24 These datasets were linked using unique encoded identifiers and analyzed at ICES. (Table S1).  
25  
26  
27

### 28 *Participants*

29  
30 We included all live in-hospital births within the Lambton (Sarnia is the major urban centre)  
31  
32 Windsor and London-Middlesex Local Health Integration Network (LHIN) sub-regions over a 15  
33  
34 year accrual period (between April 1, 1993 and March 31, 2009). For much of the study period,  
35  
36 since 2006, LHINs were the health authorities responsible for regional administration of  
37  
38 healthcare services in Ontario.<sup>38</sup> The three sub-regions were chosen for comparison as they align  
39  
40 with previously conducted studies,<sup>39</sup> each of their major cities (Sarnia, Windsor and London) are  
41  
42 separated by  $\leq 200$  kilometers (km), and they have similar climate and socioeconomic exposures.  
43  
44  
45 However, these sub-regions differ in their air pollution levels due to the major industries present  
46  
47 in each. (See Supplement)  
48  
49  
50  
51  
52  
53  
54  
55  
56  
57  
58  
59  
60

1  
2  
3 We excluded births if they occurred outside these sub-regions, or if the mother lived in a  
4 different sub-region in the one year prior to delivery (to establish perinatal exposure). We  
5  
6 excluded deliveries of multiple births and births prior to 37 weeks gestation as these are known  
7  
8 risk factors for asthma.<sup>40</sup> We further excluded deliveries where the mother was less than 14 years  
9  
10 of age or older than 50 years, and infants who died or did not reside in the region of birth for at  
11  
12 least one year (to establish early life exposure).  
13  
14  
15  
16  
17  
18

### 19 *Exposures*

20  
21 Our primary exposure of interest was the geographic area of birth, namely, the LHIN sub-regions  
22  
23 of Lambton, Windsor and London-Middlesex. This was determined using the child's postal code  
24  
25 at birth (Table S2).  
26  
27  
28  
29  
30

31 Secondary exposures included i) the fiscal year in which child was born as this would reflect  
32  
33 ambient pollutant (and other) exposures present both in-utero and in the first year of life during  
34  
35 the critical period for asthma susceptibility, and ii) ambient air pollutant concentrations (used as  
36  
37 a proxy for air pollution exposure). Exposure measures for nitrogen dioxide (NO<sub>2</sub>), ozone (O<sub>3</sub>)  
38  
39 and particulate matter 2.5 micrometers or smaller (PM<sub>2.5</sub>) were assigned to each child based on  
40  
41 their forward sortation area or city region of birth. Additional covariates reported to be  
42  
43 associated with risk of childhood asthma were also included (see Supplement).  
44  
45  
46  
47  
48  
49  
50

### 51 *Outcomes*

1  
2  
3 Our primary outcome was the physician-diagnosed incidence of asthma as identified using the  
4 Ontario Asthma Surveillance Information System (OASIS). OASIS has a sensitivity of 89% and  
5 specificity of 72% to detect asthma in children, and has been widely used to evaluate asthma  
6 rates and related health care burden in Ontario.<sup>1,4,41-44</sup> Children were followed for a maximum of  
7 10 years to capture the majority of childhood asthma cases<sup>45</sup>. Our secondary outcome was  
8 persistent asthma beyond age 6. (see Supplement).  
9  
10  
11  
12  
13  
14  
15  
16  
17  
18  
19  
20

### 21 *Statistical analysis*

22  
23 We compared baseline cohort characteristics between regions using one-way ANOVA and Chi  
24 square tests as appropriate. We constructed Kaplan Meier curves to examine the 10-year  
25 incidence of asthma, and compared regions using the log-rank test. Individuals were censored at  
26 the age of 10 or death. We used adjusted Cox proportional-hazards models to assess the relative  
27 difference in risk of asthma by age 10 in the three sub-regions, with Lambton as the reference.  
28 We adjusted models for maternal age, maternal asthma, sex, rural geography, neighbourhood  
29 material deprivation, neighbourhood ethnic concentration, caesarian section delivery, and fiscal  
30 year of birth. Due to recent declining pollution levels, we tested for an interaction between the  
31 sub-regions and year of birth using the log-likelihood ratio test, and if significant, reported  
32 results in four-year groupings (fiscal years 1993-1996, 1997-2000, 2001-2004, 2005-2008). For  
33 our secondary outcome, a second adjusted Cox proportional-hazards model was developed to  
34 examine the risk of persistent asthma.  
35  
36  
37  
38  
39  
40  
41  
42  
43  
44  
45  
46  
47  
48  
49  
50  
51  
52  
53  
54  
55  
56  
57  
58  
59  
60



1  
2  
3 To compare the risk of incident asthma attributable to NO<sub>2</sub>, O<sub>3</sub>, SO<sub>2</sub>, or PM<sub>2.5</sub>, four pre-defined  
4 sensitivity models were developed as above, but each with the additional inclusion of one  
5 pollutant exposure. In a final analysis, all pollutants were included the same model. Results are  
6 expressed as hazard ratios (HR) and 95% confidence intervals (CI). All analyses were conducted  
7 using SAS version 9.4 (SAS Institute, Cary, NC), and we interpreted 2-tailed P-values <0.05 as  
8 statistically significant.  
9  
10  
11  
12  
13  
14  
15  
16  
17  
18

### 19 *Ethics approval*

20 This study was approved by the Children's Hospital of Eastern Ontario research ethics board.  
21  
22  
23  
24  
25

### 26 **Results**

27 We identified 2,112,270 children who were born in hospital in Ontario between the fiscal years  
28 of 1993 to 2008. After excluding those born outside of the regions of interest and following  
29 exclusions for data integrity, a total of 114,427 children were retained (Figure 1), with 16,758  
30 (14.6%) born in Lambton, 34,962 (30.6%) born in Windsor and 62,707 (54.8%) born in London-  
31 Middlesex.  
32  
33  
34  
35  
36  
37  
38  
39  
40  
41

42 The most notable differences in baseline population characteristics (Table 1) were the proportion  
43 of rurality, which was highest in Lambton at 27.2% of the population, and neighbourhood-level  
44 characteristics such as income quintile distribution, with evidence of lower socioeconomic status  
45 in Windsor, along with higher levels of ethnic concentration and material deprivation.  
46  
47  
48  
49  
50  
51  
52  
53  
54  
55  
56  
57  
58  
59  
60

1  
2  
3 Air pollutant levels at birth differed between regions, with the highest NO<sub>2</sub> concentration seen in  
4 Windsor (34.9 parts per billion (ppb) ± 3.9), and the highest O<sub>3</sub> (41.8 ppb ± 1.9), PM<sub>2.5</sub> (23.6 ppb  
5 ± 2.8) and SO<sub>2</sub> (8.8 ppb ± 1.8) levels seen in Lambton. Air pollutant levels generally decreased  
6 over the study period, although levels of O<sub>3</sub> remained stable (Supplementary Figures 1A-1D).  
7  
8  
9

10  
11  
12  
13  
14 The overall cumulative incidence of asthma by age 10 years was 22.6 per 1,000 person years,  
15 with the highest incidence in Lambton at 30.3, followed by Windsor at 24.4 and lowest in  
16 London-Middlesex at 19.8 per 1,000 person years (p<0.0001) (Figure 2).  
17  
18  
19  
20

21  
22  
23 We identified a significant interaction by birth year (p<0.001) (Table 2), although unadjusted and  
24 adjusted hazard ratios remained significant across the years, with risk estimates attenuated over  
25 time. The lowest risk of asthma persisted in London-Middlesex (adjusted HR in 2005-2008 birth  
26 years = 0.65, 95% CI: 0.60, 0.71), followed by Windsor (adjusted HR in 2005-2008 birth years =  
27 0.67, 95% CI: 0.61, 0.74), compared to Lambton.  
28  
29  
30  
31  
32  
33  
34  
35  
36  
37

38 In our secondary analysis, we found that the adjusted risk of persistent asthma was still lowest in  
39 London-Middlesex (HR = 0.62, 95% CI: 0.59, 0.65), followed by Windsor (HR = 0.76, 95% CI:  
40 0.72, 0.80), compared to Lambton (Table S3).  
41  
42  
43  
44  
45  
46

47 In sensitivity analyses the hierarchy of adjusted asthma risk between sub-regions was preserved,  
48 though the magnitude of the difference in asthma risk was reduced with the sequential addition  
49 of individual air pollutants, with the greatest risk reduction noted after the addition of PM<sub>2.5</sub>.  
50  
51  
52  
53  
54  
55  
56  
57  
58  
59  
60

1  
2  
3 When combining all four air pollutants, the difference in adjusted asthma risk was further  
4 reduced and no longer significantly different between regions (Table 3).  
5  
6  
7

## 8 9 10 **Interpretation**

11  
12  
13  
14 In this population-based study comparing three cities in Southwestern Ontario with varied levels  
15 of air pollution over 25 years, we observed a significantly lower cumulative incidence of asthma  
16 in London-Middlesex and Windsor compared to Lambton (Sarnia). This difference was present  
17 after adjusting for multiple confounders associated with asthma risk, such as sex, socioeconomic  
18 factors and urban versus rural setting. While the risk of asthma reduced in more recent years, the  
19 hierarchy of adjusted asthma risk between sub-regions was preserved and remained significant.  
20 These findings remained robust when we examined for persistent asthma beyond the age of six.  
21 The difference in asthma risk estimates were most reduced with the addition of PM<sub>2.5</sub> and were  
22 no longer significant when all four air pollutants were included in the model.  
23  
24  
25  
26  
27  
28  
29  
30  
31  
32  
33  
34  
35  
36  
37

38 Our results suggest that children in Sarnia have an increased risk of developing asthma which  
39 might be due to higher levels of air pollutants in this region. In our sample of over 100,000  
40 children born in Southwestern Ontario over a 16-year period, we identified higher levels of PM<sub>2.5</sub>  
41 and SO<sub>2</sub> present in the first year of life for children born and living in the Lambton LHIN sub-  
42 region (with includes Sarnia). We also found that the decline in the risk of asthma in more recent  
43 years paralleled the concurrent decrease in air pollution.  
44  
45  
46  
47  
48  
49  
50  
51  
52  
53  
54  
55  
56  
57  
58  
59  
60

1  
2  
3 Our results are similar to the few other studies that have explored and also identified a  
4 relationship between asthma incidence and air pollution exposure in children<sup>15,16</sup>. However, the  
5 natural experimental design of our study strengthens these previous observations by  
6 demonstrating an increased risk of asthma in comparison to regions (i.e. control cohorts) with  
7 lower air pollution levels. A recent study of children in California demonstrated reductions in  
8 asthma incidence concurrent with a reduction in air pollution<sup>46</sup> suggesting there may be a dose-  
9 response effect. While this previous study relied on patient/parent report of an asthma diagnosis  
10 (which may be unreliable), our study used a more valid physician-diagnosis of asthma for the  
11 outcome, and similarly showed reductions in asthma incidence as ambient air pollution levels  
12 have fallen in recent years. Reduced air pollution may not be the only reason for recent  
13 decreasing asthma incidence as lower rates of public smoking and increases in protective factors  
14 such as breast feeding may have also contributed. However, in our analyses that adjusted for all  
15 four air pollutant exposures in combination, the difference in asthma risk between regions was  
16 completely removed, lending further support to the likelihood of air pollution being an important  
17 mechanism in childhood asthma incidence.  
18  
19  
20  
21  
22  
23  
24  
25  
26  
27  
28  
29  
30  
31  
32  
33  
34  
35  
36  
37  
38  
39

40 Recent literature has focused on the effect of traffic-related air pollution on asthma  
41 development,<sup>47-49,50</sup> as the measured effects of industry related pollutants have been inconsistent  
42 in previous studies, perhaps due to inaccuracies in assignment of pollution exposure.<sup>51,52,53</sup> In our  
43 study we were able to sequentially analyze the difference in asthma risk between regions  
44 attributable to each individual type of air pollutant, and found that adjustment for exposure to  
45 NO<sub>2</sub> and O<sub>3</sub>, compounds present in the atmosphere primarily due to air traffic pollution, only  
46 modestly reduced this difference. Adjustment for PM<sub>2.5</sub> significantly attenuated the difference in  
47  
48  
49  
50  
51  
52  
53  
54  
55  
56  
57  
58  
59  
60

1  
2  
3 asthma risk between London-Middlesex or Windsor versus Lambton, suggesting it may be the  
4 most contributory air pollutant to explain differences in asthma risk in this region. Although  
5  
6 PM<sub>2.5</sub> and SO<sub>2</sub> are present in traffic-related air pollution, the largest sources in Sarnia are from  
7  
8 petrochemical processing and smelting, where major industrial processes can be found. In this  
9  
10 study, adjustment for SO<sub>2</sub> did not attenuate the difference in asthma risk. This may be due to the  
11  
12 differences in exposure assignment; SO<sub>2</sub> exposure was obtained at a larger geographic level  
13  
14 (city/region) and thus, this measure may be less accurate than the other pollutant exposures  
15  
16 which were obtained at the smaller (neighbourhood) level.  
17  
18  
19  
20  
21  
22  
23

24 A few recent studies have linked fine particulate matter (PM<sub>2.5</sub>)<sup>46</sup> to new onset asthma both in the  
25  
26 USA and globally. Within Canada, Buteau et al. examined the incidence of asthma in relation to  
27  
28 proximity to industrial air pollution emitters in a population-based birth cohort, and found that  
29  
30 the hazard of asthma incidence was proportional to increasing exposure to PM<sub>2.5</sub> and SO<sub>2</sub>.<sup>19</sup> A  
31  
32 cohort study by Clark et al, similarly demonstrated that the incidence of asthma in preschool  
33  
34 children was proportional to the distance from industrial emitters within a 10 km radius of the  
35  
36 child's residence at birth and during the first year of life.<sup>18</sup> These previous studies, despite their  
37  
38 limited follow up duration and lack of adjustment for traffic-related air pollutants, support our  
39  
40 current study.  
41  
42  
43  
44  
45  
46

#### 47 *Limitations*

48

49 There are a number of strengths to this study including its population-based design, long  
50  
51 observation period, and large sample size. One of the potential limitations is that our study  
52  
53 design did not allow for individual measures of air pollution exposure; however, this lack of  
54  
55  
56  
57  
58  
59  
60

1  
2  
3 individual measurement should have been addressed in our natural study design which allowed  
4 comparison of asthma incidence with otherwise comparable geographic regions with  
5  
6 significantly lower overall ambient pollution levels. We were also limited in our ability to  
7  
8 account for some potential unmeasured contributors to asthma risk, (e.g. environmental tobacco  
9  
10 smoke, maternal breast-feeding, or allergen exposure), however our novel use of linked health  
11  
12 administrative databases allowed us to account for others, such as socioeconomic status, and  
13  
14 certain birth and perinatal risk factors.  
15  
16  
17  
18  
19  
20

### 21 *Conclusions*

22  
23 We identified a higher incidence of asthma among children born in the Lambton (Sarnia) sub-  
24  
25 LHIN region relative to two other regions in Southwestern Ontario. We observed that PM<sub>2.5</sub>, an  
26  
27 industrial pollutant found at highest levels in the Lambton sub-LHIN region may be contributing  
28  
29 to this higher asthma risk. This study suggests that limiting early exposure to air pollution may  
30  
31 be a strategy for primary prevention of asthma and could be confirmed in future studies.  
32  
33  
34  
35  
36  
37

### 38 **References:**

- 39  
40  
41  
42  
43  
44  
45  
46  
47  
48  
49  
50  
51  
52  
53  
54  
55  
56  
57  
58  
59  
60
1. Gershon AS, Guan J, Wang C, To T. Trends in asthma prevalence and incidence in Ontario, Canada, 1996-2005: a population study. *American journal of epidemiology*. 2010;172(6):728-736.
  2. Global Initiative for Asthma - The global asthma report. 2016.
  3. Li X, Sundquist K, Sundquist J. Parental occupation and risk of hospitalization for asthma in children and adolescents. *The Journal of asthma : official journal of the Association for the Care of Asthma*. 2009;46(8):815-821.
  4. Cope SF, Ungar WJ, Glazier RH. Socioeconomic factors and asthma control in children. *Pediatric pulmonology*. 2008;43(8):745-752.
  5. Chen E, Bloomberg GR, Fisher EB, Jr., Strunk RC. Predictors of repeat hospitalizations in children with asthma: the role of psychosocial and socioenvironmental factors. *Health psychology : official journal of the Division of Health Psychology, American Psychological Association*. 2003;22(1):12-18.
  6. Chen Y, Stewart P, Johansen H, McRae L, Taylor G. Sex difference in hospitalization due to asthma in relation to age. *Journal of clinical epidemiology*. 2003;56(2):180-187.

7. Schatz M, Cook EF, Joshua A, Petitti D. Risk factors for asthma hospitalizations in a managed care organization: development of a clinical prediction rule. *The American journal of managed care*. 2003;9(8):538-547.
8. Fuhrman C, Dubus JC, Marguet C, et al. Hospitalizations for asthma in children are linked to undertreatment and insufficient asthma education. *The Journal of asthma : official journal of the Association for the Care of Asthma*. 2011;48(6):565-571.
9. Jin Y, Seiber EE, Ferketich AK. Secondhand smoke and asthma: what are the effects on healthcare utilization among children? *Preventive medicine*. 2013;57(2):125-128.
10. Wang Z, May SM, Charoenlap S, et al. Effects of secondhand smoke exposure on asthma morbidity and health care utilization in children: a systematic review and meta-analysis. *Annals of allergy, asthma & immunology : official publication of the American College of Allergy, Asthma, & Immunology*. 2015;115(5):396-401.e392.
11. Roberts G, Patel N, Levi-Schaffer F, Habibi P, Lack G. Food allergy as a risk factor for life-threatening asthma in childhood: a case-controlled study. *The Journal of allergy and clinical immunology*. 2003;112(1):168-174.
12. Simpson AB, Yousef E, Hossain J. Association between peanut allergy and asthma morbidity. *The Journal of pediatrics*. 2010;156(5):777-781, 781.e771.
13. Brunekreef B, Holgate ST. Air pollution and health. *Lancet (London, England)*. 2002;360(9341):1233-1242.
14. Weinmayr G, Romeo E, De Sario M, Weiland SK, Forastiere F. Short-term effects of PM10 and NO2 on respiratory health among children with asthma or asthma-like symptoms: a systematic review and meta-analysis. *Environmental health perspectives*. 2010;118(4):449-457.
15. Lavigne E, Villeneuve PJ, Cakmak S. Air pollution and emergency department visits for asthma in Windsor, Canada. *Canadian journal of public health = Revue canadienne de sante publique*. 2012;103(1):4-8.
16. Burra TA, Moineddin R, Agha MM, Glazier RH. Social disadvantage, air pollution, and asthma physician visits in Toronto, Canada. *Environmental research*. 2009;109(5):567-574.
17. Szyzkowicz M. Ambient air pollution and daily emergency department visits for asthma in Edmonton, Canada. *International journal of occupational medicine and environmental health*. 2008;21(1):25-30.
18. Clark NA, Demers PA, Karr CJ, et al. Effect of early life exposure to air pollution on development of childhood asthma. *Environmental health perspectives*. 2010;118(2):284-290.
19. Buteau S, Doucet M, Tétreault LF, et al. A population-based birth cohort study of the association between childhood-onset asthma and exposure to industrial air pollutant emissions. *Environment international*. 2018;121(Pt 1):23-30.
20. Jerrett M, Shankardass K, Berhane K, et al. Traffic-related air pollution and asthma onset in children: a prospective cohort study with individual exposure measurement. *Environmental health perspectives*. 2008;116(10):1433-1438.
21. McConnell R, Islam T, Shankardass K, et al. Childhood incident asthma and traffic-related air pollution at home and school. *Environmental health perspectives*. 2010;118(7):1021-1026.
22. Jacquemin B, Siroux V, Sanchez M, et al. Ambient air pollution and adult asthma incidence in six European cohorts (ESCAPE). *Environmental health perspectives*. 2015;123(6):613-621.
23. Cai Y, Zijlema WL, Doiron D, et al. Ambient air pollution, traffic noise and adult asthma prevalence: a BioSHaRE approach. *The European respiratory journal*. 2017;49(1).
24. Martinez FD. Toward asthma prevention--does all that really matters happen before we learn to read? *The New England journal of medicine*. 2003;349(15):1473-1475.

- 1
  - 2
  - 3
  - 4
  - 5
  - 6
  - 7
  - 8
  - 9
  - 10
  - 11
  - 12
  - 13
  - 14
  - 15
  - 16
  - 17
  - 18
  - 19
  - 20
  - 21
  - 22
  - 23
  - 24
  - 25
  - 26
  - 27
  - 28
  - 29
  - 30
  - 31
  - 32
  - 33
  - 34
  - 35
  - 36
  - 37
  - 38
  - 39
  - 40
  - 41
  - 42
  - 43
  - 44
  - 45
  - 46
  - 47
  - 48
  - 49
  - 50
  - 51
  - 52
  - 53
  - 54
  - 55
  - 56
  - 57
  - 58
  - 59
  - 60
25. Radhakrishnan D, Shariff SZ, To T. The influence of prenatal mental health service use on the incidence of childhood asthma: a population-based cohort study. *The Journal of asthma : official journal of the Association for the Care of Asthma*. 2018;1-9.
26. Khreis H, Kelly C, Tate J, Parslow R, Lucas K, Nieuwenhuijsen M. Exposure to traffic-related air pollution and risk of development of childhood asthma: A systematic review and meta-analysis. *Environment international*. 2017;100:1-31.
27. Crighton EJ, Feng J, Gershon A, Guan J, To T. A spatial analysis of asthma prevalence in Ontario. *Canadian journal of public health = Revue canadienne de sante publique*. 2012;103(5):e384-389.
28. MacDonald E SR. *Exposing Canada's Chemical Valley: An Investigation of Cumulative Air Pollution Emissions in the Sarnia, Ontario Area*. Toronto2007.
29. Cribb R ME, Jarvis C, Bogdan S, Bocknek M, MacKenzie R. In Sarnia's Chemical Valley, is "toxic soup" making people sick? . *Toronto Star*. October 14, 2017.
30. World Health Organization. Tackling the global clean air challenge. 2011; [http://www.who.int/mediacentre/news/releases/2011/air\\_pollution\\_20110926/en/](http://www.who.int/mediacentre/news/releases/2011/air_pollution_20110926/en/). Accessed May 1, 2018.
31. Oiamo TH, Luginaah IN, Atari DO, Gorey KM. Air pollution and general practitioner access and utilization: a population based study in Sarnia, 'Chemical Valley,' Ontario. *Environmental health : a global access science source*. 2011;10:71.
32. Ghazawi FM, Le M, Cyr J, et al. Analysis of acute myeloid leukemia incidence and geographic distribution in Canada from 1992 to 2010 reveals disease clusters in Sarnia and other industrial US border cities in Ontario. *Cancer*. 2019;125(11):1886-1897.
33. Nicholls SG, Quach P, von Elm E, et al. The REporting of Studies Conducted Using Observational Routinely-Collected Health Data (RECORD) Statement: Methods for Arriving at Consensus and Developing Reporting Guidelines. *PLoS one*. 2015;10(5):e0125620.
34. Flora Matheson JD, Katherine Smith, Rahim Moineddin, Richard Glazier. Ontario Marginalization Index User Guide 1.0. [http://www.torontohealthprofiles.ca/onmarg/userguide\\_data/ON-Marg\\_user\\_guide\\_1.0\\_FINAL\\_MAY2012.pdf](http://www.torontohealthprofiles.ca/onmarg/userguide_data/ON-Marg_user_guide_1.0_FINAL_MAY2012.pdf) Accessed September 16 2019.
35. Matheson FI, Dunn JR, Smith KL, Moineddin R, Glazier RH. Development of the Canadian Marginalization Index: a new tool for the study of inequality. *Canadian journal of public health = Revue canadienne de sante publique*. 2012;103(8 Suppl 2):S12-16.
36. Ontario Ministry of Environment Conservation and Parks. 2010; <http://www.airqualityontario.com/>. Accessed September 2019.
37. Environment Canada National Air Pollution Surveillance Program. 2019; <https://www.canada.ca/en/environment-climate-change/services/air-pollution/monitoring-networks-data/national-air-pollution-program.html>. Accessed August 2019.
38. Government of Ontario, Ministry of Health Local Health Integration Networks. Accessed August 2019.
39. Fung KY, Luginaah IN, Gorey KM. Impact of air pollution on hospital admissions in Southwestern Ontario, Canada: generating hypotheses in sentinel high-exposure places. *Environ Health*. 2007;6:18.
40. Jaakkola JJ, Ahmed P, Ieromnimon A, et al. Preterm delivery and asthma: a systematic review and meta-analysis. *The Journal of allergy and clinical immunology*. 2006;118(4):823-830.
41. To T, Dell S, Dick PT, et al. Case verification of children with asthma in Ontario. *Pediatric allergy and immunology : official publication of the European Society of Pediatric Allergy and Immunology*. 2006;17(1):69-76.
42. Gershon AS, Wang C, Guan J, Vasilevska-Ristovska J, Cicutto L, To T. Identifying patients with physician-diagnosed asthma in health administrative databases. *Canadian respiratory journal*. 2009;16(6):183-188.



- 1
- 2
- 3
- 4 43. Larsen K, Zhu J, Feldman LY, et al. The Annual September Peak in Asthma Exacerbation Rates. Still a Reality? *Annals of the American Thoracic Society*. 2016;13(2):231-239.
- 5
- 6 44. To T, Guan J, Wang C, et al. Is large birth weight associated with asthma risk in early childhood? *Archives of disease in childhood*. 2012;97(2):169-171.
- 7
- 8 45. Kovesi T, Schuh S, Spier S, et al. Achieving control of asthma in preschoolers. *CMAJ : Canadian Medical Association journal = journal de l'Association medicale canadienne*. 2010;182(4):E172-183.
- 9
- 10
- 11 46. Garcia E, Berhane KT, Islam T, et al. Association of Changes in Air Quality With Incident Asthma in Children in California, 1993-2014. *Jama*. 2019;321(19):1906-1915.
- 12
- 13 47. Pennington AF, Strickland MJ, Klein M, et al. Exposure to Mobile Source Air Pollution in Early-life and Childhood Asthma Incidence: The Kaiser Air Pollution and Pediatric Asthma Study. *Epidemiology (Cambridge, Mass)*. 2018;29(1):22-30.
- 14
- 15
- 16 48. Salam MT, Islam T, Gilliland FD. Recent evidence for adverse effects of residential proximity to traffic sources on asthma. *Current opinion in pulmonary medicine*. 2008;14(1):3-8.
- 17
- 18 49. Bråbäck L, Forsberg B. Does traffic exhaust contribute to the development of asthma and allergic sensitization in children: findings from recent cohort studies. *Environmental health : a global access science source*. 2009;8:17.
- 19
- 20
- 21
- 22 50. Achakulwisut P, Brauer M, Hystad P, Anenberg SC. Global, national, and urban burdens of paediatric asthma incidence attributable to ambient NO2 pollution: estimates from global datasets. *Lancet Planet Health*. 2019;3(4):e166-e178.
- 23
- 24
- 25 51. Bowatte G, Lodge C, Lowe AJ, et al. The influence of childhood traffic-related air pollution exposure on asthma, allergy and sensitization: a systematic review and a meta-analysis of birth cohort studies. *Allergy*. 2015;70(3):245-256.
- 26
- 27
- 28
- 29 52. Kravitz-Wirtz N, Teixeira S, Hajat A, Woo B, Crowder K, Takeuchi D. Early-Life Air Pollution Exposure, Neighborhood Poverty, and Childhood Asthma in the United States, 1990(-)2014. *International journal of environmental research and public health*. 2018;15(6).
- 30
- 31
- 32 53. Anderson GRF, G; Atkinson, Richard W. Long-term exposure to air pollution and the incidence of asthma: meta-analysis of cohort studies. *Air Qual Atmos Health*. 2013;6:47-56.
- 33
- 34
- 35 54. *Air Quality in Ontario - Ministry of the Environment and Climate Change Report*. 2016; <http://www.airqualityontario.com/downloads/AirQualityInOntarioReportAnd552016.pdf>, Sept 2019. 2019.
- 36
- 37
- 38 55. Ducharme FM, Dell SD, Radhakrishnan D, et al. Diagnosis and management of asthma in preschoolers: A Canadian Thoracic Society and Canadian Paediatric Society position paper. *Paediatrics & child health*. 2015;20(7):353-371.
- 39
- 40
- 41 56. Martinez FD, Wright AL, Taussig LM, Holberg CJ, Halonen M, Morgan WJ. Asthma and wheezing in the first six years of life. The Group Health Medical Associates. *The New England journal of medicine*. 1995;332(3):133-138.
- 42
- 43
- 44
- 45
- 46
- 47
- 48
- 49
- 50
- 51
- 52
- 53
- 54
- 55
- 56
- 57
- 58
- 59
- 60

**Table 1. Cohort Description**

|                                                  | <b>Lambton<br/>LHIN sub-region</b> | <b>Windsor<br/>LHIN sub-<br/>region</b> | <b>London-Middlesex<br/>LHIN sub-region</b> | <b>P-Value</b> |
|--------------------------------------------------|------------------------------------|-----------------------------------------|---------------------------------------------|----------------|
|                                                  | <i>n = 16,758</i>                  | <i>n = 34,962</i>                       | <i>n = 62,707</i>                           |                |
| <b>Maternal characteristics at delivery date</b> |                                    |                                         |                                             |                |
| Age, yr, mean ± SD                               | 27.94 ± 5.37                       | 28.30 ± 5.47                            | 29.11 ± 5.44                                | <.001          |
| Age group, yr, N (%)                             |                                    |                                         |                                             |                |
| 15-29                                            | 10,203 (60.9%)                     | 20,261 (58.0%)                          | 31,930 (50.9%)                              | <.001          |
| 30-39                                            | 6,285 (37.5%)                      | 14,029 (40.1%)                          | 29,366 (46.8%)                              |                |
| 40-49                                            | 270 (1.6%)                         | 672 (1.9%)                              | 1,411 (2.3%)                                |                |
| Rural geography, N (%)                           | 4,557 (27.2%)                      | 15 (0.0%)                               | 3,264 (5.2%)                                | <.001          |
| Income quintile                                  |                                    |                                         |                                             |                |
| 1 - lowest                                       | 3,918 (23.4%)                      | 10,971 (31.4%)                          | 14,272 (22.8%)                              | <.001          |
| 2                                                | 3,408 (20.3%)                      | 9,105 (26.0%)                           | 13,397 (21.4%)                              |                |
| 3                                                | 3,394 (20.3%)                      | 7,551 (21.6%)                           | 12,723 (20.3%)                              |                |
| 4                                                | 3,406 (20.3%)                      | 4,083 (11.7%)                           | 12,277 (19.6%)                              |                |
| 5 - highest                                      | 2,509 (15.0%)                      | 3,200 (9.2%)                            | 9,887 (15.8%)                               |                |
| missing                                          | 123 (0.7%)                         | 52 (0.1%)                               | 151 (0.2%)                                  |                |
| Residential instability, N (%)                   |                                    |                                         |                                             |                |
| 1 – least instability                            | 2,391 (14.3%)                      | 2,810 (8.0%)                            | 9,436 (15.0%)                               | <.001          |
| 2                                                | 3,483 (20.8%)                      | 4,783 (13.7%)                           | 11,554 (18.4%)                              |                |
| 3                                                | 4,533 (27.0%)                      | 6,985 (20.0%)                           | 11,834 (18.9%)                              |                |
| 4                                                | 3,681 (22.0%)                      | 11,184 (32.0%)                          | 13,382 (21.3%)                              |                |
| 5 – most instability                             | 2,670 (15.9%)                      | 9,200 (26.3%)                           | 16,501 (26.3%)                              |                |
| Material deprivation, N (%)                      |                                    |                                         |                                             |                |
| 1 - least deprived                               | 2,541 (15.2%)                      | 3,993 (11.4%)                           | 11,889 (19.0%)                              | <.001          |
| 2                                                | 3,319 (19.8%)                      | 6,411 (18.3%)                           | 10,960 (17.5%)                              |                |
| 3                                                | 3,400 (20.3%)                      | 5,455 (15.6%)                           | 13,039 (20.8%)                              |                |
| 4                                                | 3,114 (18.6%)                      | 6,975 (20.0%)                           | 13,119 (20.9%)                              |                |
| 5 – most deprived                                | 4,384 (26.2%)                      | 12,128 (34.7%)                          | 13,700 (21.8%)                              |                |
| Dependency, N (%)                                |                                    |                                         |                                             |                |
| 1 - lowest                                       | 1,543 (9.2%)                       | 5,591 (16.0%)                           | 15,393 (24.5%)                              | <.001          |
| 2                                                | 2,934 (17.5%)                      | 7,869 (22.5%)                           | 16,275 (26.0%)                              |                |
| 3                                                | 3,575 (21.3%)                      | 7,872 (22.5%)                           | 14,897 (23.8%)                              |                |
| 4                                                | 4,277 (25.5%)                      | 8,810 (25.2%)                           | 9,438 (15.1%)                               |                |
| 5 - highest                                      | 4,429 (26.4%)                      | 4,820 (13.8%)                           | 6,704 (10.7%)                               |                |
| Ethnic concentration, N (%)                      |                                    |                                         |                                             |                |
| 1 - lowest                                       | 6,903 (41.2%)                      | 3,509 (10.0%)                           | 9,437 (15.0%)                               | <.001          |
| 2                                                | 4,688 (28.0%)                      | 4,400 (12.6%)                           | 11,755 (18.7%)                              |                |
| 3                                                | 3,435 (20.5%)                      | 6,268 (17.9%)                           | 17,248 (27.5%)                              |                |
| 4                                                | 1,553 (9.3%)                       | 10,080 (28.8%)                          | 15,731 (25.1%)                              |                |
| 5 - highest                                      | 179 (1.1%)                         | 10,705 (30.6%)                          | 8,536 (13.6%)                               |                |
| <b>Newborn characteristics</b>                   |                                    |                                         |                                             |                |
| Female, N (%)                                    | 8,224 (49.1%)                      | 16,982 (48.6%)                          | 30,543 (48.7%)                              | 0.562          |
| Low birth weight/preterm, N (%)                  | 1,445 (8.6%)                       | 3,104 (8.9%)                            | 5,533 (8.8%)                                | 0.622          |
| Mean NO <sub>2</sub> ** (ppb), mean ± SD         | 28.4 ± 4.8                         | 34.9 ± 3.9                              | 28.5 ± 4.2                                  | <.001          |
| Mean O <sub>3</sub> ** (ppb), mean ± SD          | 41.8 ± 1.9                         | 39.6 ± 2.6                              | 40.3 ± 2.0                                  | <.001          |
| Mean PM <sub>2.5</sub> ** (ppb), mean ± SD       | 23.6 ± 2.8                         | 21.3 ± 1.5                              | 17.74 ± 1.6                                 | <.001          |

1  
2  
3 Mean SO<sub>2</sub>\*\* (ppb), mean ± SD      8.8 ± 1.8      6.6 ± 1.7      2.75 ± 0.9      <.001  
4

---

5 \* Low birth weight or preterm refers to infants born with low birth weight <2500 grams, small for gestational age,  
6 intrauterine growth restriction or preterm gestation <37 weeks. All diagnostic codes are detailed in Table S1

7 \*\* NO<sub>2</sub> and O<sub>3</sub> data were available between 1996 – 2009; PM<sub>2.5</sub> data were available between 2003-2009; SO<sub>2</sub> data  
8 were available between 1993 – 2009. Pollution values were based on annual summaries, and assigned to children at  
9 the time (i.e. year) of birth and location of birth (i.e. residential FSAs or city of birth depending on the source of  
10 data).  
11

12 NO<sub>2</sub> = nitrogen dioxide, O<sub>3</sub> = ozone, PM<sub>2.5</sub> = fine particulate matter, SO<sub>2</sub> = sulfur dioxide, SD = standard deviation,  
13 ppb = parts per billion  
14  
15  
16  
17  
18  
19  
20  
21  
22  
23  
24  
25  
26  
27  
28  
29  
30  
31  
32  
33  
34  
35  
36  
37  
38  
39  
40  
41  
42  
43  
44  
45  
46  
47  
48  
49  
50  
51  
52  
53  
54  
55  
56  
57  
58  
59  
60

Confidential

**Table 2. Cox proportional-hazards estimates for the development of asthma by age 10 years**

| Birth (fiscal) years         | HR (95% CI)      |                  |                  |
|------------------------------|------------------|------------------|------------------|
|                              | Unadjusted       | Adjusted*        |                  |
| <b>1993-1996</b>             | Lambton          | REF              | REF              |
|                              | Windsor          | 0.68 (0.64-0.73) | 0.6 (0.56-0.65)  |
|                              | London-Middlesex | 0.57 (0.54-0.61) | 0.54 (0.51-0.58) |
| <b>1997-2000</b>             | Lambton          | REF              | REF              |
|                              | Windsor          | 0.84 (0.77-0.9)  | 0.77 (0.71-0.84) |
|                              | London-Middlesex | 0.63 (0.59-0.68) | 0.61 (0.56-0.66) |
| <b>2001-2004</b>             | Lambton          | REF              | REF              |
|                              | Windsor          | 0.9 (0.83-0.97)  | 0.8 (0.73-0.88)  |
|                              | London-Middlesex | 0.69 (0.64-0.75) | 0.65 (0.6-0.71)  |
| <b>2005-2008</b>             | Lambton          | REF              | REF              |
|                              | Windsor          | 0.85 (0.78-0.92) | 0.67 (0.61-0.74) |
|                              | London-Middlesex | 0.77 (0.71-0.83) | 0.65 (0.6-0.71)  |
| <b>1993-2008 (all years)</b> | Lambton          | REF              | REF              |
|                              | Windsor          | 0.81 (0.78-0.84) | 0.7 (0.67-0.73)  |
|                              | London-Middlesex | 0.66 (0.63-0.68) | 0.61 (0.58-0.63) |

\*Adjusted for maternal age, maternal asthma, sex, rural geography, neighbourhood material deprivation, neighbourhood ethnic concentration, caesarian section delivery, fiscal year.

HR: Hazard Ratio; CI: Confidence Interval

**Table 3. Association of individual air pollution exposures on adjusted Cox proportional hazards estimates for development of asthma by age 10 years**

|                                  |                  | HR (95% CI)      |
|----------------------------------|------------------|------------------|
|                                  |                  | Adjusted*        |
| Model A: NO <sub>2</sub>         | Lambton          | REF              |
|                                  | Windsor          | 0.72 (0.67-0.77) |
|                                  | London-Middlesex | 0.63 (0.60-0.66) |
| Model B: O <sub>3</sub>          | Lambton          | REF              |
|                                  | Windsor          | 0.73 (0.69-0.77) |
|                                  | London-Middlesex | 0.62 (0.59-0.65) |
| Model C: SO <sub>2</sub>         | Lambton          | REF              |
|                                  | Windsor          | 0.72 (0.68-0.75) |
|                                  | London-Middlesex | 0.64 (0.59-0.69) |
| Model D: PM <sub>2.5</sub>       | Lambton          | REF              |
|                                  | Windsor          | 0.75 (0.69-0.82) |
|                                  | London-Middlesex | 0.71 (0.63-0.81) |
| Model E: all pollutants combined | Lambton          | REF              |
|                                  | Windsor          | 0.79 (0.62-1.01) |
|                                  | London-Middlesex | 0.89 (0.64-1.24) |

\*Adjusted for maternal age, maternal asthma, sex, rural geography, neighbourhood material deprivation, neighbourhood ethnic concentration, caesarian section delivery, fiscal year.

HR: Hazard Ratio; CI: Confidence Interval

Cohorts are restricted to children with no missing pollution exposures (i.e. models A, B: N = 92,809; model C: N = 114,427; model D, E: N = 44,737).

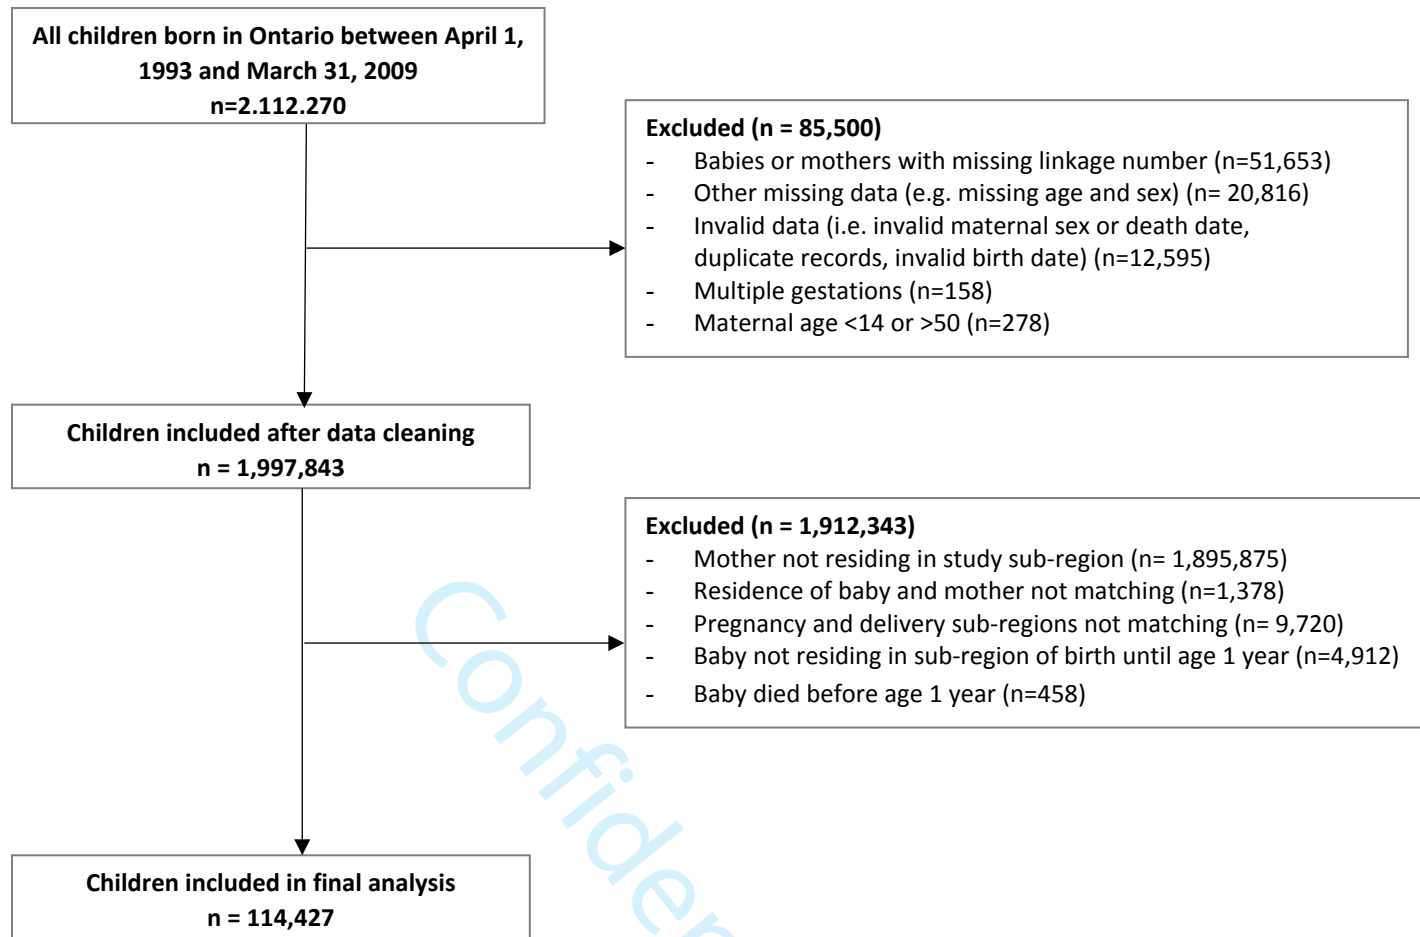

35  
36  
37  
38  
39  
40  
41  
42  
43  
44  
45  
46  
47  
48  
49  
50  
51  
52  
53  
54  
55  
56  
57  
58  
59  
60

**Figure 1. Cohort Inclusion/Exclusions Flow Chart**

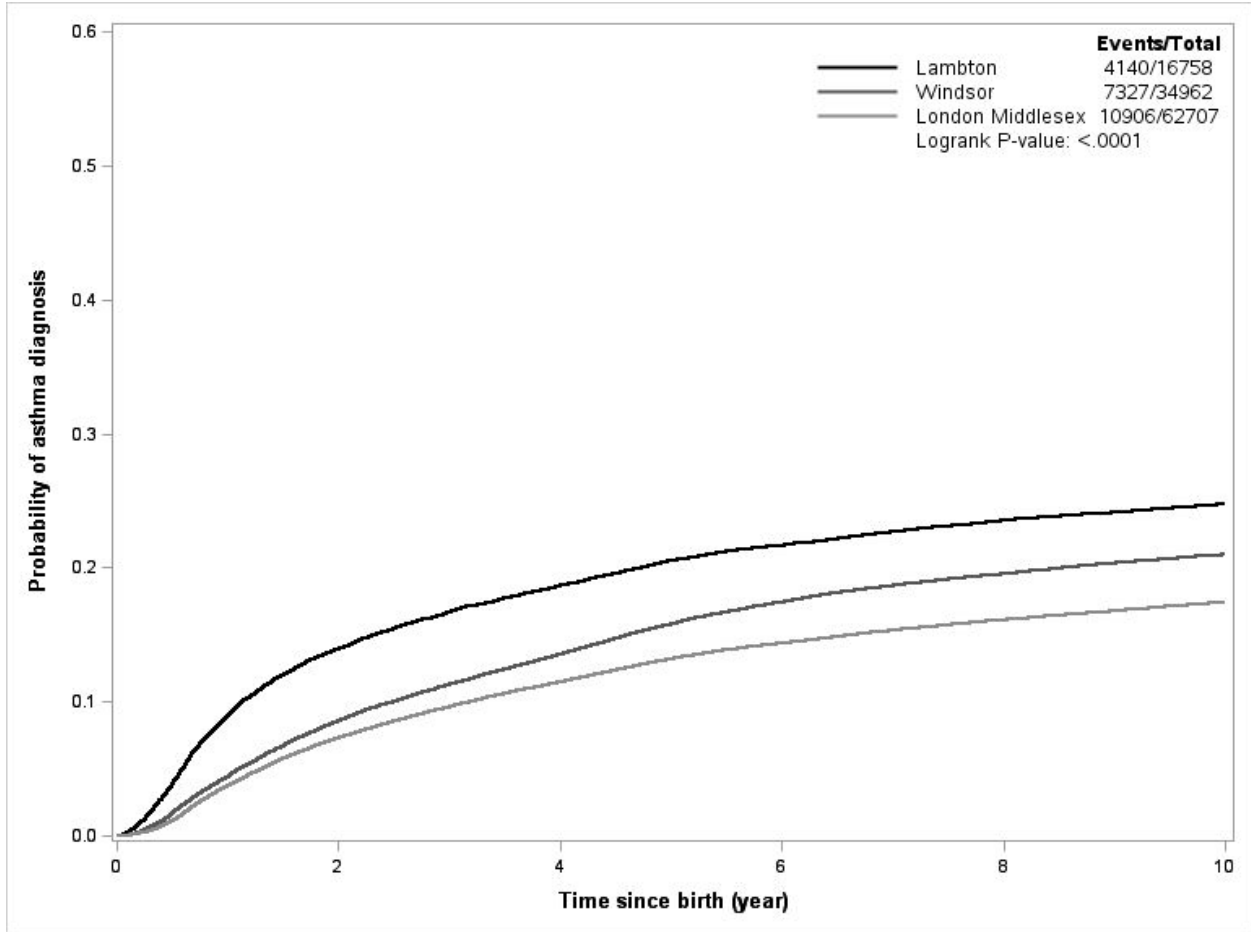

Figure 2. Probability of developing asthma by region of birth, censored at age 10 years

## Online Supplementary Materials

### Methods (supplemental)

#### *Study Setting*

A key difference between Sarnia, Windsor and London, Ontario, the three major urban centres within the study sub-regions of interest, is the major industry present in each. While Sarnia is a Canadian hub for petrochemical processing, the major industries in Windsor include automobile assembly plants, and scrap metal recycling. Windsor has high exposure to transboundary air and water pollution from Ohio, Illinois and Michigan, and is also immediately downwind of major steel mills in Detroit, and 100 km down river from Sarnia. The city of London-Middlesex is the home of many branches of industry, corporate offices, medical and educational facilities. It is also a manufacturing, distribution and financial center, with less emphasis on manufacturing in the last few decades.

#### *Secondary exposures*

While NO<sub>2</sub> and O<sub>3</sub> are known to be markers of traffic related air pollution, SO<sub>2</sub>, though also found in traffic related air pollution, is often used as a marker of industry related air pollution.<sup>51</sup> There are various sources for PM<sub>2.5</sub> including residential fireplace and wood stoves, pollen, industrial processes, as well as traffic.<sup>52</sup> \*\* NO<sub>2</sub> and O<sub>3</sub> data were available between 1996 – 2009; PM<sub>2.5</sub> data were available between 2003-2009; SO<sub>2</sub> data were available between 1993 – 2009.

#### *Additional Covariates*

Information on additional covariates that have been previously shown to be associated with risk of childhood asthma were also collected at the time of the child's birth including: sex, rural (community size <10,000 persons) versus urban location of residence, neighbourhood income quintile (approximated by linking the child's postal code at birth to the nearest Canadian census information), ONMarg index (with each of its four dimensions included separately in the multivariable logistic regression model), maternal age, maternal history of asthma, maternal diabetes, caesarian versus vaginal delivery, and preterm or low birthweight.



1  
2  
3  
4  
5 ***Secondary outcomes***  
6

7 Our secondary outcome, persistent asthma, was defined as those children with incident asthma  
8 who continued to have a subsequent health care encounter (outpatient visit or hospitalization) for  
9 asthma after the age of six years, or who newly developed asthma after the age of six years. This  
10 secondary outcome was explored due to the likelihood of asthma symptoms persisting in to  
11 adulthood in these children and specific definitions were chosen as per previous studies on  
12 phenotyping of asthma in children.<sup>56</sup>  
13  
14  
15  
16  
17  
18  
19  
20  
21  
22  
23  
24  
25  
26  
27  
28  
29  
30  
31  
32  
33  
34  
35  
36  
37  
38  
39  
40  
41  
42  
43  
44  
45  
46  
47  
48  
49  
50  
51  
52  
53  
54  
55  
56  
57  
58  
59  
60

Confidential

**Table S1. Database descriptions**

| Database                                                     | Description                                                                                                                                                                                                                                                                                                                                                                                                                                                                                                                                                                                                                                                                                                                                                                                                                                                                                                                                                                                                                                                                                                                                                                                                                                                                                                                                                                                                                                                                                                                                                                                |
|--------------------------------------------------------------|--------------------------------------------------------------------------------------------------------------------------------------------------------------------------------------------------------------------------------------------------------------------------------------------------------------------------------------------------------------------------------------------------------------------------------------------------------------------------------------------------------------------------------------------------------------------------------------------------------------------------------------------------------------------------------------------------------------------------------------------------------------------------------------------------------------------------------------------------------------------------------------------------------------------------------------------------------------------------------------------------------------------------------------------------------------------------------------------------------------------------------------------------------------------------------------------------------------------------------------------------------------------------------------------------------------------------------------------------------------------------------------------------------------------------------------------------------------------------------------------------------------------------------------------------------------------------------------------|
| Ontario Health Insurance Plan (OHIP) Claims History Database | <p>The OHIP claims database contains information on inpatient and outpatient services provided to Ontario residents eligible for the province's publicly funded health insurance system by fee-for-service health care practitioners (primarily physicians) and "shadow billings" for those paid through non-fee-for-service payment plans.</p> <p>Billing codes on the claims (OHIP fee codes) identify the care provider, their area of specialization and the type and location of service. OHIP billing claims also contain a 3-digit diagnosis code - the main reason for the service - captured using a modified version of the ICD, 8th revision coding system. OHIP claims are well completed, but the validity of the diagnosis coding is highly variable.<sup>1</sup></p>                                                                                                                                                                                                                                                                                                                                                                                                                                                                                                                                                                                                                                                                                                                                                                                                        |
| OHIP Registered Persons Database (RPDB)                      | <p>The OHIP RPDB provides basic demographic information (age, sex, location of residence, date of birth, and date of death for deceased individuals) for those issued an Ontario health insurance number. The RPDB also indicates the time periods for which an individual was eligible to receive publicly funded health insurance benefits and the best known postal code for each registrant on July 1st of each year.</p>                                                                                                                                                                                                                                                                                                                                                                                                                                                                                                                                                                                                                                                                                                                                                                                                                                                                                                                                                                                                                                                                                                                                                              |
| Discharge Abstract Database (DAD)                            | <p>The DAD is compiled by the Canadian Institute for Health Information (CIHI) and contains administrative, clinical (diagnoses and procedures/interventions), demographic, and administrative information for all admissions to acute care hospitals in Ontario. At ICES, consecutive DAD records are linked together to form 'episodes of care' among the hospitals to which patients have been transferred after their initial admission. Prior to April 1, 2002, diagnoses (up to 16 on a given DAD record) are captured using the International Statistical Classification of Diseases, Injuries, and Causes of Death, 9th Revision (ICD-9) coding system and procedures (up to 10 on a given DAD record) are captured using the Canadian Classification of Diagnostic, Therapeutic, and Surgical Procedures (CCP) coding system. Following April 1, 2002, diagnoses (up to 25 on a given DAD record) are captured using the International Statistical Classification of Diseases and Related Health Problems, 10th Revision, Canada (ICD-10-CA) coding system and interventions (up to 20 on a given DAD record) are captured using the Canadian Classification of Health Interventions (CCI) coding system.</p> <p>In a hospital medical record reabstraction study of 14,500 hospital discharges from 18 hospital sites between April 2002 and March 2004, DAD records were demonstrated to have excellent agreement (over 99%) for nonmedical information such as demographic and administrative data. Regarding diagnoses, median agreement between the original DAD records</p> |

|                                                                    |                                                                                                                                                                                                                                                                                                                                                                                                                                                                                                                                                                                                                                                                                                                          |
|--------------------------------------------------------------------|--------------------------------------------------------------------------------------------------------------------------------------------------------------------------------------------------------------------------------------------------------------------------------------------------------------------------------------------------------------------------------------------------------------------------------------------------------------------------------------------------------------------------------------------------------------------------------------------------------------------------------------------------------------------------------------------------------------------------|
|                                                                    | and the reabstracted records for the 50 most common most responsible diagnoses was 81% (Sensitivity 82%; Specificity 82%). <sup>2</sup> The corresponding median agreement for the 50 most frequently performed surgical procedures was 92% (sensitivity 95%, positive predictive value 91%).                                                                                                                                                                                                                                                                                                                                                                                                                            |
| ICES Mother-Baby Linked Database (MOMBABY)                         | The ICES MOMBABY Database links the DAD inpatient admission records of delivering mothers and their newborns. From 2002 onward, this linkage is performed deterministically using a maternal-newborn chart matching number. Prior to 2002, mothers were linked to their children by matching on the institutions they were admitted, their postal codes, and their admission/discharge dates.                                                                                                                                                                                                                                                                                                                            |
| Ontario Ministry of Environment air quality data                   | The Ontario Ministry of Environment has a network of 38 outdoor air monitoring stations providing hourly concentrations of pollutants including, ozone, nitrogen dioxide and fine particulate matter.                                                                                                                                                                                                                                                                                                                                                                                                                                                                                                                    |
| Environment Canada national air pollution surveillance data (NAPS) | The NAPS database provides long-term air quality data for the purpose of monitoring and assessing the quality of outdoor air across Canada. Currently there are 286 sites in 203 communities in every province and territory providing continuous measurement of sulphur dioxide, nitrogen dioxide, ozone, fine particulate matter and carbon monoxide.                                                                                                                                                                                                                                                                                                                                                                  |
| Ontario Marginalization Index (ONMarg)                             | This is a neighbourhood level measure of socioeconomic status that comprises multiple factors that may adversely impact health. The four dimensions of the Ontario Marginalization Index are i) residential instability: includes measures of crowding, marital status, etc., ii) material deprivation: incorporates education, low income and unemployment, iii) dependency: measures the proportion of seniors or young children versus employed individuals and iv) ethnic concentration: reflects the proportion of visible minorities or recent immigrants. <sup>3</sup> Each dimension of the Ontario Marginalization Index is divided into quintiles (Quintile 1 = least amount of marginalization). <sup>3</sup> |

1. Williams J, Young W. A summary of the quality of health care administrative databases in Canada. In: Goel V, Williams J, Anderson G, Blackstien-Hirsch P, Fooks C, Naylor C, editors. *Patterns of Health Care in Ontario: The ICES Practice Atlas*. 2nd Edition. Ottawa: Canadian Medical Association; 1996. 339-346.

2. Juurlink D, Preyra C, Croxford R, Chong A, Austin P, Tu J et al. Canadian Institute for Health Information Discharge Abstract Database: A Validation Study. 2006. Toronto, Institute for Clinical Evaluative Sciences. Ref Type: Report

3. Matheson FI, Dunn JR, Smith KL, Moineddin R, Glazier RH. Development of the Canadian Marginalization Index: a new tool for the study of inequality. *Canadian journal of public health Revue canadienne de sante publique*. 2012;103(8 Suppl 2):S12-16.

**Table S2. Health administrative codes used to define exposure variables and outcomes**

| Variable                                           | Database                                                                                                        | Codes                                                                  | Details                                                                                                                                    |
|----------------------------------------------------|-----------------------------------------------------------------------------------------------------------------|------------------------------------------------------------------------|--------------------------------------------------------------------------------------------------------------------------------------------|
| Live births                                        | MOMBABY                                                                                                         | B_date                                                                 |                                                                                                                                            |
| Local Health Integration Network (LHIN) sub-region | Registered Persons Database (RPDB)                                                                              | PSTLCODE                                                               | Used postal code recorded on a child's OHIP registration at birth within Lambton, Windsor and London-Middlesex sub-regions                 |
| Asthma                                             | Ontario Asthma Surveillance Information System (OASIS)                                                          | ICD9: 493<br>ICD10: J45, J46<br>OHIPdx: 493                            | One hospital admission with a most responsible diagnosis of asthma, or two outpatient physician visits for asthma within a two-year period |
| Air pollutant concentrations                       | Ontario Ministry of Environment Air Quality Data<br>Environment Canada National Air Pollution Surveillance Data | Nitrogen dioxide<br>Sulfur dioxide<br>Particulate matter<br>$\leq 2.5$ |                                                                                                                                            |

ICD = International Classification of Diseases, OHIP = Ontario Health Insurance Plan, MOMBABY = an ICES derived dataset that includes all mothers linked to their hospital-born children,

**Table S3. Cox proportional hazards estimates for the development of persistent asthma**

|                  | HR (95% CI)      |                  |
|------------------|------------------|------------------|
|                  | Unadjusted       | Adjusted*        |
| Lambton          |                  | REF              |
| Windsor          | 0.88 (0.84-0.93) | 0.76 (0.72-0.80) |
| London-Middlesex | 0.68 (0.65-0.71) | 0.62 (0.59-0.65) |

Persistent asthma = asthma diagnosis after age 6 and/or asthma diagnosis prior to age 6 and subsequent asthma health care encounter after age 6. Cohort N = 114,427; Number of events excluded = 7,593 children who did not have an asthma related health care encounter after the age of 6 years. Number of asthma events = 14,780.

\*Adjusted for maternal age, maternal asthma, sex, rural geography, neighbourhood material deprivation, neighbourhood ethnic concentration, caesarian section delivery, fiscal year.

HR: Hazard Ratio; CI: Confidence Intervals

Confidential

1  
2  
3  
4  
5  
6  
7  
8  
9  
10  
11  
12  
13  
14  
15  
16  
17  
18  
19  
20  
21  
22  
23  
24  
25  
26  
27  
28  
29  
30  
31  
32  
33  
34  
35  
36  
37  
38  
39  
40  
41  
42  
43  
44  
45  
46  
47  
48  
49  
50  
51  
52  
53  
54  
55  
56  
57  
58  
59  
60

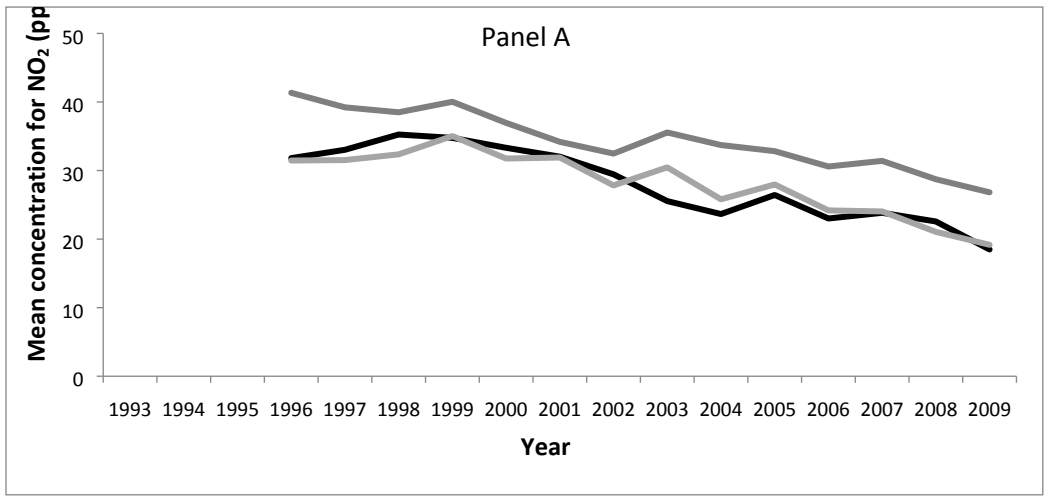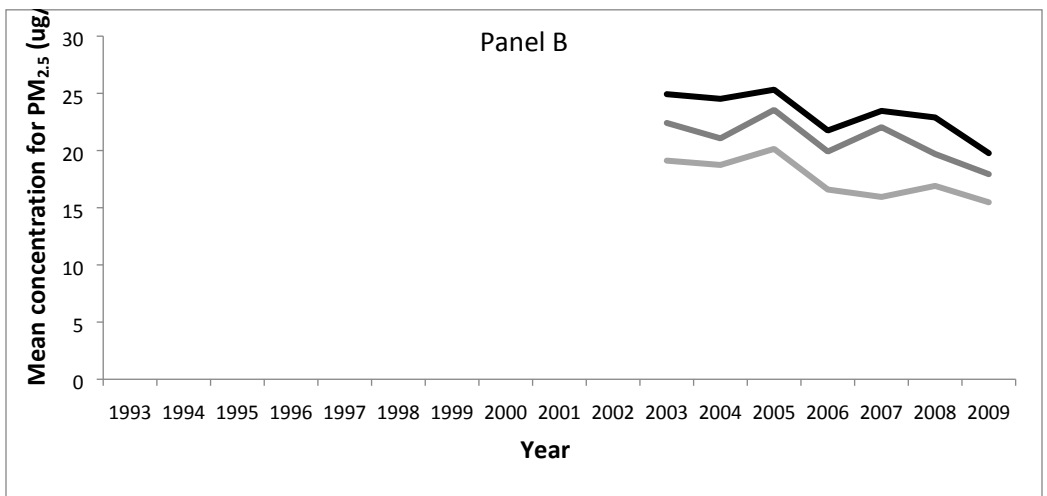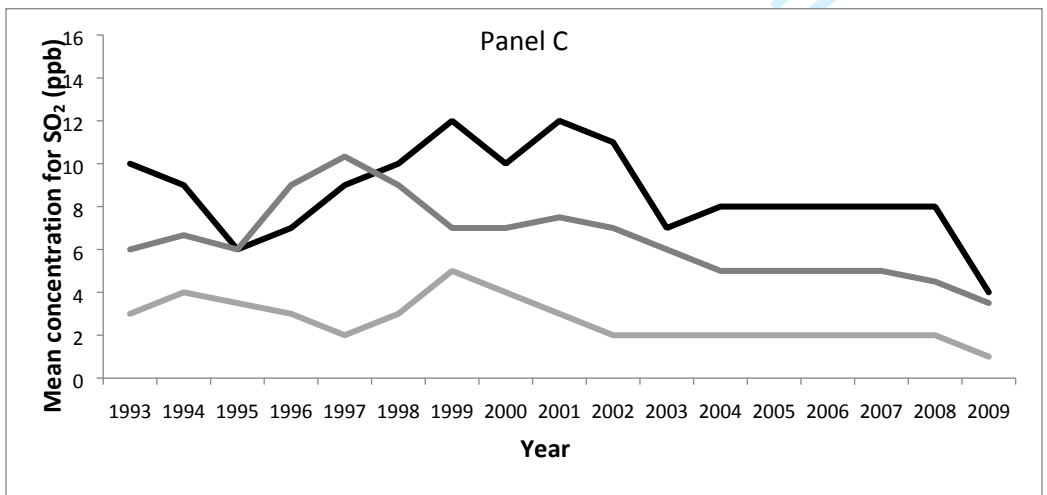

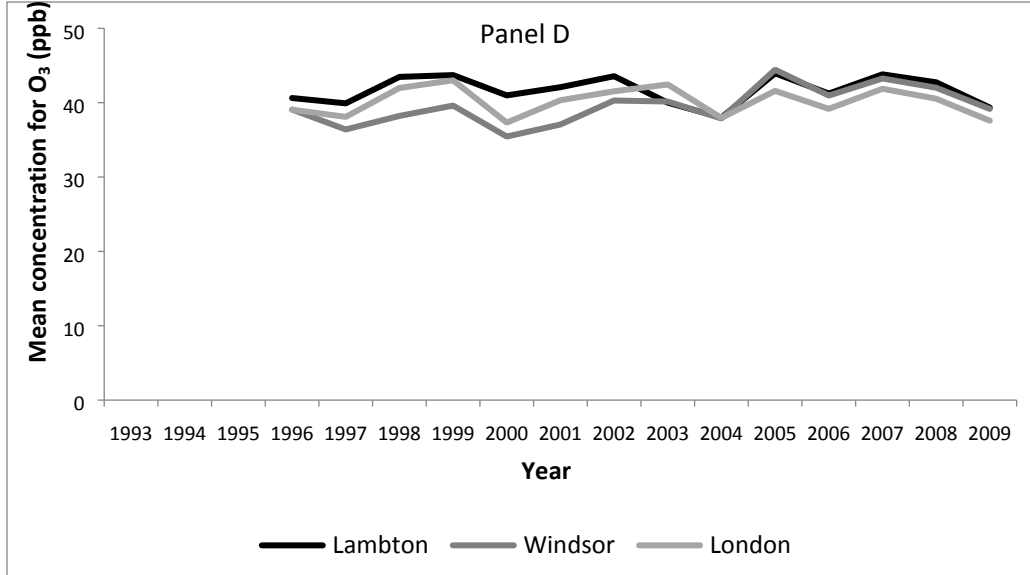

**Figure S1. Mean air pollution concentrations for A) Nitrogen dioxide, NO<sub>2</sub>, B) fine particulate matter, PM<sub>2.5</sub>, C) Sulphur dioxide, SO<sub>2</sub>, and D) Ozone, O<sub>3</sub> assigned to children at the time of birth and summarized by city.**

Pollution values are based on annual summaries of pollution levels by forward sortation area (NO<sub>2</sub>, PM<sub>2.5</sub>, O<sub>3</sub>) or city (SO<sub>2</sub>). NO<sub>2</sub> and O<sub>3</sub> data were available between 1996 – 2009; PM<sub>2.5</sub> data were available between 2003-2009; SO<sub>2</sub> data were available between 1993 – 2009. ppb: part per billion; ug/m<sup>3</sup>: microgram per cubic meter
